# Supplementary material for: Effect of Antenatal of brief-CBT on fear of childbirth, prenatal attachment, and quality of life (QoL): A Quasi-Experimental Study
Source: Research Square preprint supplement (doi:10.21203/rs.3.rs-6534688/v1), 2025-07-31
Supplement: Supplementary file 1 [file 076fc1af88fc9698d0a8fa64.docx]

**Supplementary information 1. Four week CBT sessions for the fear of childbirth and prenatal among pregnant women**

| **Session** | **Training content** |
| --- | --- |
| First | Introduction: Beginning with a mental health counselor, getting to know the respondents, describing the fear of birth giving, prenatal attachment and its impact on pregnancy and successful outcomes, summarizing the first session, assigning tasks, and collecting comments. |
| Second | Reviewing assignments and examining the previous session, familiarizing subjects with cognitive-behavioral training, introducing common mental conditions related to childbirth, identifying respondents anticipations for the intervention and addressing them if needed, educating each phase of labor, assessing and assigning assignments, summarizing the session, and soliciting feedback. Figuring out and overcoming negative or distorted ideas, views, and perceptions related to the session topic. |
| Third | Evaluating tasks and assessing prior sessions, teamwork, practicing behavioral techniques such as distraction, deep breathing, and progressive muscle relaxation, listening to spiritual songs (mezmur), music, and Quran recitation, cultural approaches for maternal resilience (Qanafa for those practicing the culture and similarily for others also, talking to the unborn child), and behavioral approaches to dealing with childbirth anxiety and sleep problems, summarizing the session, assigning tasks, and providing feedback. |
| Fourth | Reviewing tasks provided so far and skimming past sessions, final summaries, providing assignments, and receiving feedback. |

CBT: cognitive behavioral therapy; CBGT: cognitive behavioral group therapy, Qanafa is an honorific insignia that was given to women to wear on her forehead during and after childbirth, as is customary in the West Arsi zone of the Oromia regional state. According to customary law, during the qanafa phase, family members, including the spouse, are obligated to appease the mother while avoiding upsetting her(73).
